# Supplementary material for: Scale-insensitive estimation of speed and distance traveled from animal tracking data
Source: Springer Nature journal article supplement (doi:10.1186/s40462-019-0177-1), 2019-11-15
Supplement: 40462_2019_177_MOESM4_ESM.pdf [file 40462_2019_177_MOESM4_ESM.pdf]

## Additional file S4 — R script for reproducing the simulations comparing CTSD to SLD

In this appendix we provide the R script required to reproduce the SLD and CTSD comparison simulations.

### Sampling frequency

As described in the main text, our first set of simulations tested how variation in sampling frequencies influenced estimates. We set the position and velocity autocorrelation timescales to 1 day, and 1 hour respectively, and simulated a fine scale trajectory from this model, sampled for 10 days at a frequency of 4096 locations/day. This fine-scale, error-free trajectory was used to estimate the true distance travelled. After determining the truth, mean-zero Gaussian error with a standard deviation of 10m was added to each location. Using the data with added measurement error, we estimated the total distance traveled using both conventional SLD and model-smoothed SLD, in addition to CTSD estimation, and compared each of these estimates to the truth. We then thinned down the fine-scale trajectory by removing every second location, and repeated the model fitting and estimation process. This thinning and re-estimation was repeated to generate increasingly coarse data with sampling frequencies that ranged from the full resolution of 4096 locations/day, down to 8 locations/day in a halving series. The simulation, estimation, and iterative thinning process was then repeated 100 times, and results were compared across simulation runs.

### R Script

```
#Load in the requisite packages into the root environment

library(ctmm)
library(foreach)
library(doParallel)

#Build any other necessary functions

#####
#A function for calculating the SLD between supplied locations
tot.dist <- function(data){

  distance <- list()

  for(i in 2:nrow(data)){

    distance[[i]] <- sqrt((data$x[i] - data$x[i-1])^2 + (data$y[i] -
      data$y[i-1])^2)
  }
}
```

```

    sum(unlist(distance))
}

#####
##### Set up the sampling frequency simulation #####
#####

#1 day in seconds
ds <- 86400

#Spatial variance in m^2
sig <- 100000

#Specify an OUF model for simulation
#Here tau velocity is 1/24 of tau position (i.e., 1 hour)
mod1 <- ctm(tau=c(ds,ds/24),
            isotropic=TRUE,
            sigma=sig,
            mu=c(0,0))

nd <- 10 #sampling duration in days
pd <- 4096 #number of samples per day

#sampling times
st <- 1:(nd*pd)*(ds/pd)

#The proportion of data to thin
thin <- c(8, 16, 32, 64, 128, 256, 512, 1024, 2048, 4096)

#The number of replicates
nReps <- 100

res <- list()

#Loop over the thinning vector
for(i in 1:length(thin)){

  #Create an empty list for storing results
  x <- list()

  for(j in 1:nReps){

    #Print out a progress report
    cat("Starting iteration ", j, "for thinning factor", thin[i], "\n")

    message("Generating the simulated data")
  }
}

```

```

#Simulate some data from the model
sim1 <- simulate(mod1,t=st)

#Add normally distributed error to the data
error1 <- rnorm(nrow(sim1), mean = 0, sd = 10)
error2 <- rnorm(nrow(sim1), mean = 0, sd = 10)

sim.error <- sim1

sim.error[c(2,3)] <- sim.error[c(2,3)] + c(error1, error2)

#Generate a duplicate dataset without UERE information
#This is used in the joint estimation for model-smoothed SLD
sim.error.smoothing <- sim.error

#Define the UERE for CTSD with a correctly specified error model
sim.error$VAR.xy <- 100

#Use the speed function on the unthinned data, and the true model
  to get the true speed
true_dist <- ctm::speed(sim1,
                        mod1,
                        cores = -1,
                        prior = FALSE,
                        units = FALSE)

#####
#Thin the data according to the thinning vector defined above
rows.thinned <- seq(1, nrow(sim.error), by=round(pd/thin[i]))

#Thinned data with UERE information
data.thinned <- sim.error[rows.thinned,]

#Thinned data without UERE information
data.smoothing <- sim.error.smoothing[rows.thinned,]

#Store the sampling frequency of the thinned data (fixes/day)
freq <- nrow(data.thinned)/nd

#####
#The distance estimated by SLD
tot_dist <- tot.dist(data.thinned)

#####
#The speed estimated by the CTSD method

```

```

#NOTE, this first requires fitting a movement model to the data

message("Fitting the movement model with calibrated errors")
sim.mod <- ctmm.fit(data.thinned,
                    CTMM = ctmm(error=TRUE,
                                tau=c(ds,ds/24),
                                isotropic=TRUE,
                                sigma=sig,
                                mu=c(0,0)))

ctmm_dist <- speed(data.thinned,
                  sim.mod,
                  cores = -1,
                  units = FALSE)

#####
#The model-smoothed SLD
message("Jointly estimating the movement and error models")

#First jointly estimate the process and error variances
smoothing.mod <- ctmm.fit(data.smoothing,
                          CTMM = ctmm(error=TRUE,
                                      tau=c(ds,ds/24),
                                      isotropic=TRUE,
                                      sigma=sig,
                                      mu=c(0,0)))

#Smooth the data based on the fitted model
data.smoothed <- predict(data.smoothing,
                        smoothing.mod,
                        t= data.smoothing$t)

#Estimate the SLD based on the smoothed data
smoothed.SLD <- tot.dist(data.smoothed)

#Print out another progress report
cat("Finished iteration ", j, "for thinning factor", thin[i], "\n")

#####
#Store the vector of results in the list created above
x[[j]] <- c(thin[i], #The thinning factor
            freq, #The thinned frequency (fixes/day)
            true_dist[2]*(nd %>% "days"), #The 'true' distance
            tot_dist, #The distance calculated by SLD
            smoothed.SLD, #The smoothed SLD
            ctmm_dist[2]*(nd %>% "days"), #The ctstd estimate

```

```

        ctmm_dist[1]*(nd %>% "days"), #Min CI
        ctmm_dist[3]*(nd %>% "days") #Max CI
    )
}

#Unlist the results for this parameterisation
x <- do.call(rbind, x)

#And store them in a list
res[[i]] <- x

#Save the results as they come out (in case of crashes)
save(res, file = "Speed_Sims_Smoothing.rda")

#Spit out an indicator of progress
print(thin[i])
}

res <- do.call(rbind, res)

res <- data.frame("thining.fraction" = res[,1],
                 "thinned.frequency" = res[,2],
                 "true.distance" = res[,3],
                 "SLD" = res[,4],
                 "smoothed.SLD" = res[,5],
                 "CTSD.ML" = res[,6],
                 "CTSD.min" = res[,7],
                 "CTSD.max" = res[,8])

save(res, file = "Speed_Sims_Smoothing.rda")

```

## Irregular sampling

In the second set of simulations, we tested the performance of conventional SLD, model-smoothed SLD and CTSD on data with irregular sampling, where we mimicked the effect of random, sporadic data loss. We set the position and velocity autocorrelation timescales to 1 day, and 1 hour respectively, and simulated a trajectory sampled for 10 days at a constant frequency of 64 locations/day. Again, after determining the truth, mean-zero Gaussian error with a standard deviation of 10m was added to each location. We then randomly dropped a percentage of the collected locations (ranging from 0% — i.e., no data loss — to 70%, and increasing by 5% increments), where increasing the percentage of data loss resulted in increasingly irregular data. Using the irregularly thinned data with error, we estimated the total distance traveled using conventional SLD, model-smoothed SLD,

and CTSD estimation, and compared these estimates to the truth.

## R Script

```
#####  
##### Set up the irregular sampling simulation #####  
#####  
  
#1 day in seconds  
ds <- 86400  
  
#Spatial variance in m^2  
sig <- 100000  
  
#Specify an OUF model for simulation  
mod1 <- ctmm(tau=c(ds,ds/24), isotropic=TRUE, sigma=sig, mu=c(0,0))  
  
nd <- 10 #sampling duration in days  
pd <- 64 #number of samples per day  
  
#sampling times  
st <- 1:(nd*pd)*(ds/pd)  
  
#The proportion of data to thin  
loss <- c(1, 0.95, 0.90, 0.80, 0.75, 0.70, 0.65, 0.60, 0.55, 0.50,  
          0.45, 0.40, 0.35, 0.30)  
  
#The number of replicates  
nReps <- 100  
  
res <- list()  
  
#Loop over the vector defining the proportion of data to randomly thin  
for(i in 1:length(loss)){  
  
  #Create an empty list for storing results  
  x <- list()  
  
  for(j in 1:nReps){  
  
    cat("Starting iteration ", j, "for a proportional loss ", (1-loss[i]  
      ])*100, "% \n")  
  
    message("Generating the simulated data")  
  
    #Simulate some data from the model
```

```

sim1 <- simulate(mod1,t=st)

#Add normally distributed error to the data
error1 <- rnorm(nrow(sim1), mean = 0, sd = 10)
error2 <- rnorm(nrow(sim1), mean = 0, sd = 10)

sim.error <- sim1

sim.error[c(2,3)] <- sim.error[c(2,3)] + c(error1, error2)

#Generate a duplicate dataset without UERE information
#This is used in the joint estimation for model-smoothed SLD
data.smoothing <- sim.error

#Assign the 10m error as the UERE
sim.error$VAR.xy <- 100

#Use the speed function on the unthinned data, and the original
  model to get the true speed
true_dist <- ctm::speed(sim1,
                        mod1,
                        prior = FALSE,
                        units = FALSE)

#####
#Thin the data according to the proportional loss vector defined
  above
ST <- sort(sample(st, size = (length(st)*loss[i])))

#Thinned data with UERE information
data.thinned <- sim.error[which(data.smoothing$t %in% ST),]

#Thinned data without UERE information
data.smoothing <- data.smoothing[which(data.smoothing$t %in% ST),]

#Store the sampling frequency of the thinned data (fixes/day)
freq <- nrow(data.thinned)/nd

#####
#The speed estimated by SLD
tot_dist <- tot.dist(data.thinned)

#####
#The speed estimated by the CTSD method
#NOTE, this first requires fitting a movement model to the data

```

```

message("Fitting the movement model with calibrated errors")
sim.mod <- ctmm.fit(data.thinned,
                    CTMM = ctmm(error=TRUE,
                                tau=c(ds,ds/24),
                                isotropic=TRUE,
                                sigma=sig,
                                mu=c(0,0)))

ctmm_dist <- speed(data.thinned,
                  sim.mod,
                  cores = -1,
                  units = FALSE)

#####
#The model -smoothed SLD
message("Jointly estimating the movement and error models")

#The smoothed SLD
smoothing.mod <- ctmm.fit(data.smoothing,
                          CTMM = ctmm(error=TRUE,
                                        tau=c(ds,ds/24),
                                        isotropic=TRUE,
                                        sigma=sig,
                                        mu=c(0,0)))

data.smoothed <- predict(data.smoothing,
                         smoothing.mod,
                         t= data.smoothing$t)

smoothed.SLD <- tot.dist(data.smoothed)

cat("Finished iteration ", j, "for a proportional loss ", (1-loss[i]
  )*100, "% \n")

#####
#Store the vector of results in the list created above
x[[j]] <- c(loss[i], #The thinning factor
           freq, #The thinned frequency (fixes/day)
           true_dist[2]*(nd*ds), #The 'true' distance
           tot_dist, #The distance calculated by step length
           smoothed.SLD, #The smoothed SLD
           ctmm_dist[2]*(nd*ds), #The bootstrapped speed estimate
           ctmm_dist[1]*(nd*ds), #Min CI
           ctmm_dist[3]*(nd*ds) #Max CI
          )
} #close the 'iterations' loop

```



```

#Unlist the results for this parameterisation
x <- do.call(rbind, x)

#And store them in a list
res[[i]] <- x

#Save the results as they come out (in case of crashes)
save(res, file = "IrregularSampling_Sims_Smoothing.rda")

#Spit out an indicator of progress
print(loss[i])
} #Close the outer loop

res <- do.call(rbind, res)

res <- data.frame("data.loss" = res[,1],
                 "thinned.frequency" = res[,2],
                 "true.distance" = res[,3],
                 "SLD" = res[,4],
                 "smoothed.SLD" = res[,5]),
                 "CTSD.ML" = res[,6],
                 "CTSD.min" = res[,7],
                 "CTSD.max" = res[,8])

save(res, file = "IrregularSampling_Sims_Smoothing.rda")

```

## Movement tortuosity

In the third set of simulations, we tested how variation in the tortuosity of an individual's movement influenced estimates. Here, we simulated a trajectory sampled for 10 days at a constant frequency of 64 locations/day. We set the position autocorrelation timescales to 1 day, but manipulated the velocity autocorrelation timescale (ranging from 11.25 minutes to 1 day in a doubling series), where increasing the duration of velocity autocorrelation generates movement that is decreasingly tortuous (i.e., more linear, [6]). After determining the truth, mean-zero Gaussian error with a standard deviation of 10m was added to each location. The total distance traveled was then estimated using SLD, model-smoothed SLD and CTSD as described above, and these estimates were compared to the truth.

## R Script

```

#####
##### Simulations varying tortuosity #####
#####

```

```

#1 day in seconds
ds <- 86400

#Spatial variance in m^2
sig <- 100000

nd <- 10 #sampling duration in days
pd <- 64 #number of samples per day

#sampling times
st <- 1:(nd*pd)*(ds/pd)

#The vector of tau_v values to simulate
tau_v <- c(1, 2, 4, 8, 16, 32, 64, 128)

#The number of iterations
nReps <- 100

res <- list()

#Loop over the tau_v values to simulate from
for(i in 1:length(tau_v)){

  x <- list()

  for(j in 1:nReps){

    cat("Starting iteration ", j, "for a tau_v of ", (ds/tau_v[i])/60,
        "min \n")
    message("Generating the simulated data")

    #Define the movement model
    mod1 <- ctm(tau=c(ds,
                    (ds-1)/tau_v[i]),
                isotropic=TRUE,
                sigma=sig,
                mu=c(0,0))

    #Simulate some data from the model
    sim1 <- simulate(mod1,t=st)

    #Add normally distributed error to the data
    error1 <- rnorm(nrow(sim1), mean = 0, sd = 10)
    error2 <- rnorm(nrow(sim1), mean = 0, sd = 10)
  }
}

```

```

sim.error <- sim1
sim.error[c(2,3)] <- sim.error[c(2,3)] + c(error1, error2)

#Generate a duplicate dataset without UERE information
#This is used in the joint estimation for model-smoothed SLD
data.smoothing <- sim.error

#Assign the 10m error as the UERE
sim.error$VAR.xy <- 100

#Use the speed function on the data without error, and the true
  model to get the true speed
true_dist <- ctmm::speed(sim1,
                        mod1,
                        prior = FALSE,
                        units = FALSE)

#####
#The speed estimated by SLD
tot_dist <- tot.dist(sim.error)

#####
#The speed estimated by the CTSD method
#NOTE, this first requires fitting a movement model to the data

message("Fitting the movement model with calibrated errors")
sim.mod <- ctmm.fit(sim.error,
                  CTMM = ctmm(error=TRUE,
                              tau=c(ds,(ds-1)/thin[i]),
                              isotropic=TRUE,
                              sigma=sig, mu=c(0,0)))

ctmm_dist <- speed(data.thinned,
                  sim.mod,
                  cores = -1,
                  units = FALSE)

#####
#The model-smoothed SLD
message("Jointly estimating the movement and error models")

smoothing.mod <- ctmm.fit(data.smoothing,
                        CTMM = ctmm(error=TRUE,
                                    tau=c(ds,
                                            (ds-1)/thin[i]),
                                    isotropic=TRUE,

```

```

                                sigma=sig,
                                mu=c(0,0))

data.smoothed <- predict(data.smoothing,
                        smoothing.mod,
                        t= data.smoothing$t)

smoothed.SLD <- tot.dist(data.smoothed)

#Print out another progress report
cat("Finished iteration ", j, "for a tau_v of ", (ds/tau_v[i])/60,
    "min \n")

#####
#Store the vector of results in the list created above
x[[j]] <- c(tau_v[i], #The thinning factor
           true_dist[2]*(nd*ds), #The 'true' distance
           tot_dist, #The distance calculated by SLD
           smoothed.SLD, #The model-smoothed SLD
           ctmm_dist[2]*(nd*ds), #The CTSD estimate
           ctmm_dist[1]*(nd*ds), #Min CI
           ctmm_dist[3]*(nd*ds) #Max CI
          )
} #Close the 'iterations' loop

#Unlist the results for that parameterisation
x <- do.call(rbind, x)

#And store them in a list
res[[i]] <- x

#Save the results as they come out (in case of crashes)
save(res, file = "Tortuosity_Sims_Smoothing.rda")

#Spit out an indicator of progress
print(thin[i])

} #Close the outer loop

res <- do.call(rbind, res)
res <- data.frame("tau_v" = res[,1],
                 "true.distance" = res[,2],
                 "SLD" = res[,3],
                 "smoothed.SLD" = res[,4],
                 "CTSD.ML" = res[,5],
                 "CTSD.min" = res[,6],

```

```

"CTSD.max" = res[,7])

save(res, file = "Tortuosity_Sims_Smoothing.rda")

```

## Location error

In the final set of simulations, we tested how variation in the amount of measurement error influenced estimates. Here, we simulated 100 trajectories, sampled for 10 days at a fixed frequency of 64 locations/day. We set the position and velocity autocorrelation timescales to 1 day, and 1 hour respectively. After simulation, we again added mean-zero Gaussian error to each location, but here manipulated the standard deviation of the distribution (ranging from 0, i.e., no error, to 51.2 meters, in a doubling series of the minimal 0.1 m error).

## R Script

```

#####
#####      Simulations varying error magnitude      #####
#####

#1 day in seconds
ds <- 86400

#Spatial variance in m^2
sig <- 100000

nd <- 10 #sampling duration in days
pd <- 256 #number of samples per day

#sampling times
st <- 1:(nd*pd)*(ds/pd)

#The SD of the Gaussian error distribution
error <- c(0, 0.1, 0.2, 0.4, 0.8, 1.6, 3.2, 6.4, 12.8, 25.6, 51.2)

#The number of iterations
nReps <- 100

#Empty for storing results
res <- list()

#Loop over durations (days) or sampling frequencies (samp), as
  appropriate
for(i in 1:length(error)){

  x <- list()

```

```

for(j in 1:nReps){
  cat("Starting iteration ", j, "for an error of ", error[i], "m \n")
  message("Generating the simulated data")

  #Define the movement model
  mod1 <- ctm(tau=c(ds,ds/24), isotropic=TRUE, sigma=sig, mu=c(0,0))

  #Simulate some data from the model
  sim1 <- simulate(mod1,t=st)

  #Add normally distributed error to the data with the desired SD
  error1 <- rnorm(nrow(sim1), mean = 0, sd = error[i])
  error2 <- rnorm(nrow(sim1), mean = 0, sd = error[i])

  sim.error <- sim1
  sim.error[c(2,3)] <- sim.error[c(2,3)] + c(error1, error2)

  #Generate a duplicate dataset without UERE information
  #This is used in the joint estimation for model-smoothed SLD
  data.smoothing <- sim.error

  #Assign the appropriate UERE to the data
  sim.error$VAR.xy <- error[i]^2

  #Use the speed function on the data without error, and the original
  #model to get the true speed
  true_dist <- ctm::speed(sim1,
                          mod1,
                          prior = FALSE,
                          units = FALSE)

  #####
  #The speed estimated by SLD
  tot_dist <- tot.dist(sim.error)

  #####
  #The speed estimated by the CTSD method
  #NOTE, this first requires fitting a movement model to the data
  message("Fitting the movement model with calibrated errors")

  #Only turn error on when there has been error added to the data
  if(i == 1){
    ERROR <- FALSE
  } else{

```

```

    ERROR <- TRUE
  }

sim.mod <- ctmm.fit(sim.error,
                  CTMM = ctmm(error=ERROR,
                              tau=c(ds,
                                    ds/24),
                              isotropic=TRUE,
                              sigma=sig,
                              mu=c(0,0)))

ctmm_dist <- speed(sim.error,
                  sim.mod,
                  cores = -1,
                  units = FALSE)

#####
message("Jointly estimating the movement and error models")

#The model-smoothed SLD
smoothing.mod <- ctmm.fit(data.smoothing,
                        CTMM = ctmm(error=TRUE,
                                    tau=c(ds,
                                          ds/24),
                                    isotropic=TRUE,
                                    sigma=sig,
                                    mu=c(0,0)))

data.smoothed <- predict(data.smoothing,
                        smoothing.mod,
                        t= data.smoothing$t)

smoothed.SLD <- tot.dist(data.smoothed)

#Print out another progress report
cat("Finished iteration ", j, "for an error of ", error[i], "m \n")

#####
#Vector of results to return
x[[j]] <- c(error[i], #The thinning factor
           true_dist[2]*(nd*ds), #The 'true' distance
           tot_dist, #The SLD
           smoothed.SLD, #The model-smoothed SLD
           ctmm_dist[2]*(nd*ds), #The CTSD estimate

```

```

        ctm-dist[1]*(nd*ds), #Min CI
        ctm-dist[3]*(nd*ds) #Max CI
    )

} #Close the 'iterations' loop

#And store them in a list
res[[i]] <- x

#Save the results as they come out (in case of crashes)
save(res, file = "Speed_Error_Sims_Smoothing.rda")

#Spit out an indicator of progress
print(error[i])

} #Close the outer loop

res <- do.call(rbind, res)

res <- data.frame("error" = res[,1],
                 "true.distance" = res[,2],
                 "SLD" = res[,3],
                 "smoothed.SLD" = res[,4],
                 "CTSD.ML" = res[,5],
                 "CTSD.min" = res[,6],
                 "CTSD.max" = res[,7])

save(res, file = "Speed_Error_Sims_Smoothing.rda")

```

## References

- [1] Jonsen ID, Myers RA, James MC. Identifying leatherback turtle foraging behaviour from satellite telemetry using a switching state-space model. *Marine Ecology Progress Series*. 2007;337:255–264.
- [2] Breed GA, Jonsen ID, Myers RA, Bowen WD, Leonard ML. Sex-specific, seasonal foraging tactics of adult grey seals (*Halichoerus grypus*) revealed by state-space analysis. *Ecology*. 2009;90(11):3209–3221.
- [3] Cagnacci F, Boitani L, Powell RA, Boyce MS. Animal ecology meets GPS-based radiotelemetry: a perfect storm of opportunities and challenges. *Philosophical Transactions of the Royal Society of London B: Biological Sciences*. 2010;365(1550):2157–2162. Available from: <http://rstb.royalsocietypublishing.org/content/365/1550/2157>.
- [4] Frair JL, Nielsen SE, Merrill EH, Lele SR, Boyce MS, Munro RHM, et al. Removing GPS collar bias in habitat selection studies. *Journal of Applied Ecology*. 2004;41(2):201–



212. Available from: <https://besjournals.onlinelibrary.wiley.com/doi/abs/10.1111/j.0021-8901.2004.00902.x>.

- [5] Frair JL, Fieberg J, Hebblewhite M, Cagnacci F, DeCesare NJ, Pedrotti L. Resolving issues of imprecise and habitat-biased locations in ecological analyses using GPS telemetry data. *Philosophical Transactions of the Royal Society of London B: Biological Sciences*. 2010;365(1550):2187–2200. Available from: <http://rstb.royalsocietypublishing.org/content/365/1550/2187>.
- [6] Fleming CH, Calabrese JM, Mueller T, Olson KA, Leimgruber P, Fagan WF. From fine-scale foraging to home ranges: A semivariance approach to identifying movement modes across spatiotemporal scales. *The American Naturalist*. 2014 May;183(5):E154–E167.
